# Supplementary material for: A Randomised Controlled Trial of Efficacy of Cognitive Rehabilitation in Multiple Sclerosis: A Cognitive, Behavioural, and MRI Study
Source: Hindawi journal article supplement (doi:10.1155/2016/4292585), 2016-01-01
Supplement: f1 [file 4292585.f1.pdf]

## Supplemental materials

### Supplementary figure 1 CONSORT flow diagram

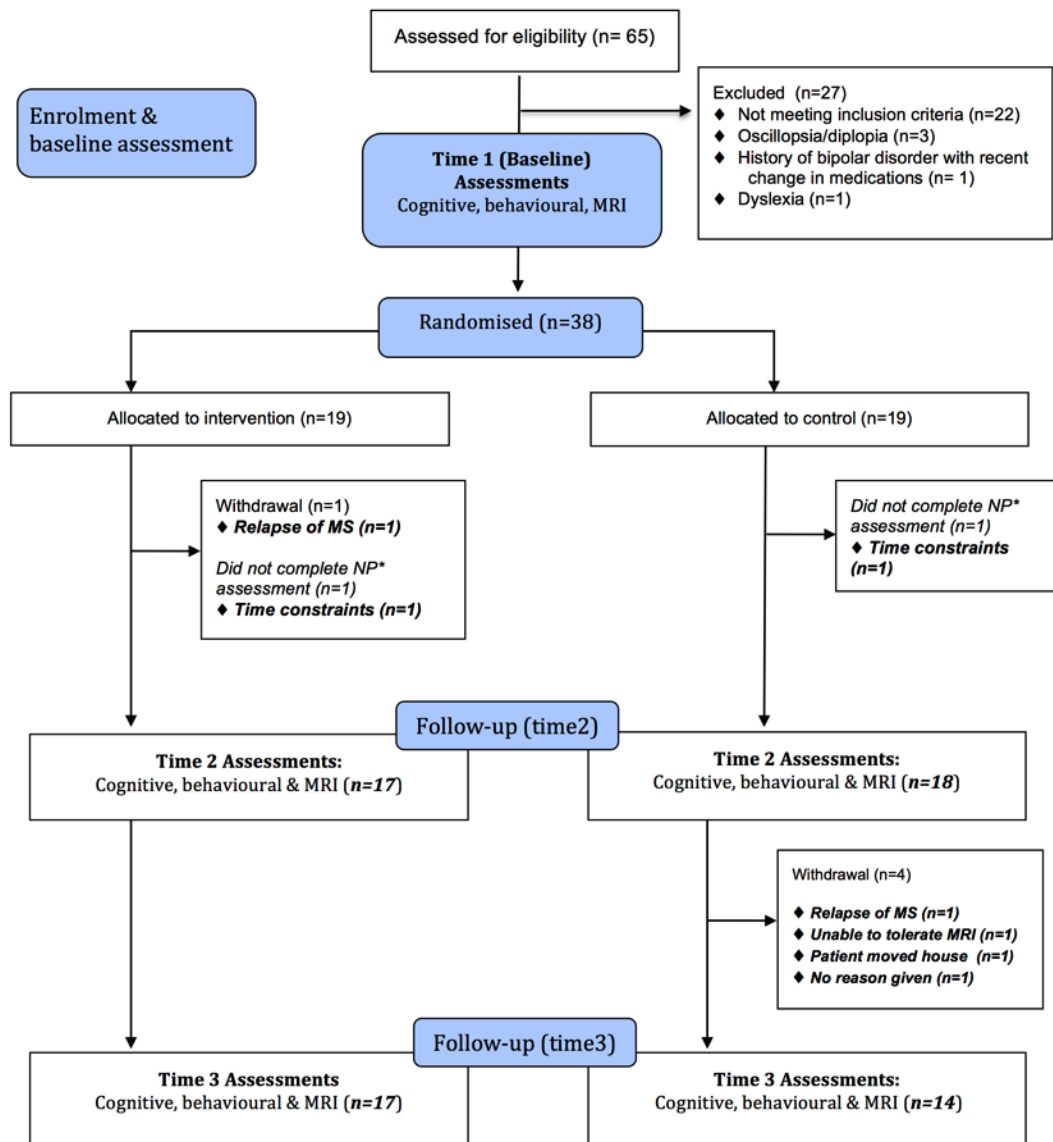

\*NP: neuropsychological

## Supplemental material

Supplementary figure 2: Task main effects for all subjects

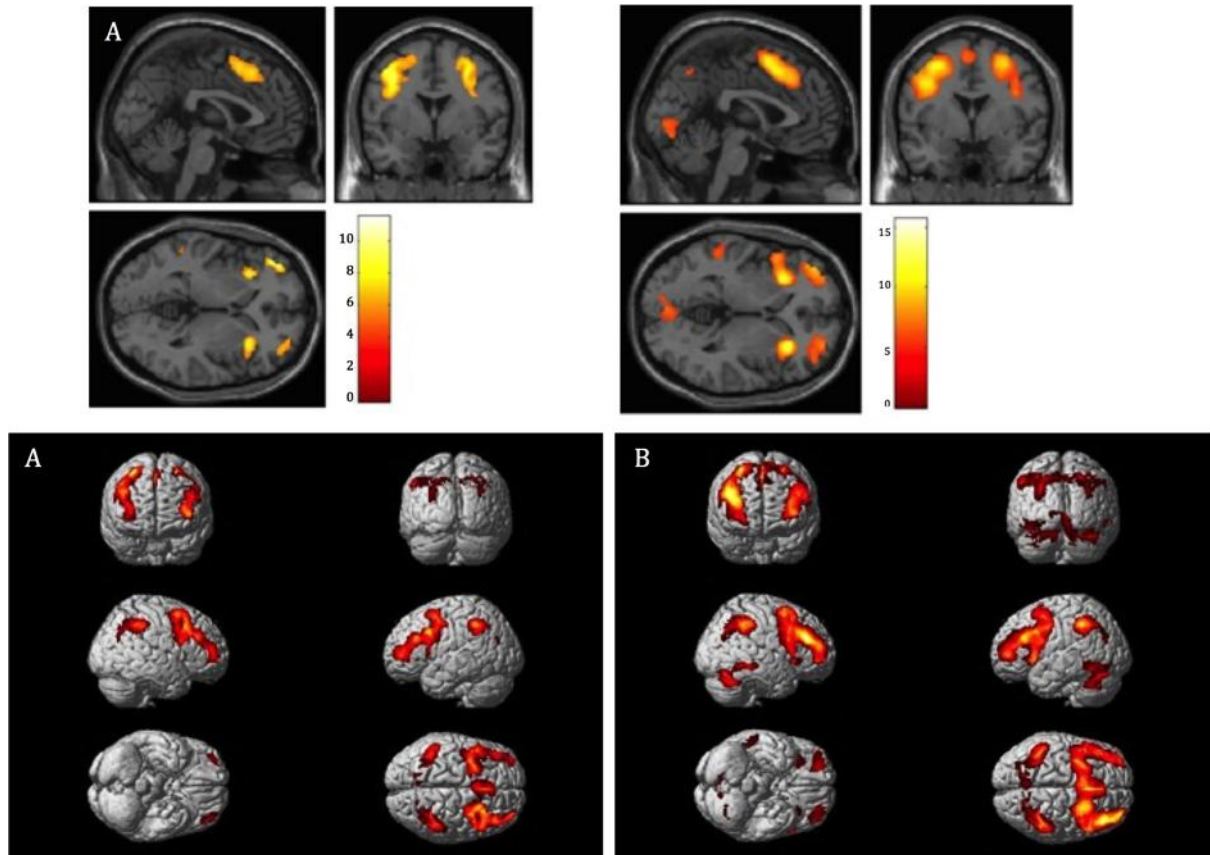

Task main effects for all subjects at baseline (n=38) showing areas of significant activation in: (a) 1-back, (b) 2-back ( $p < 0.05_{\text{FWE corrected}}$ ).

Significant activation within prefrontal cortex (DLPFC), insula, inferior parietal lobules and occipital cortices.

**Supplemental Table 2a:****Task Main effects for all subjects (baseline comparison):****Areas of Significant Activation ( $p < 0.05$  FWE corrected) for 1-back > 0-back**

| Brain region                                                 | <i>MNI Coordinates</i> |          |          | <i>Max t-score</i> | <i>K<sub>e</sub> cluster</i> |
|--------------------------------------------------------------|------------------------|----------|----------|--------------------|------------------------------|
|                                                              | <i>x</i>               | <i>y</i> | <i>z</i> |                    |                              |
| <b><i>Dorsolateral prefrontal</i></b>                        |                        |          |          |                    |                              |
| Right middle frontal gyrus                                   | 28                     | 8        | 58       | 11.49              | 4258                         |
| Left middle frontal gyrus                                    | -40                    | 48       | 2        | 9.6                |                              |
| Left precentral gyrus                                        | -36                    | 0        | 42       | 9.6                | 3267                         |
| <b><i>Parietal (inferior parietal lobule)</i></b>            |                        |          |          |                    |                              |
| Right angular gyrus                                          | 34                     | -56      | 44       | 11.21              |                              |
| Right supramarginal gyrus                                    | 50                     | -40      | 42       | 10.82              | 1940                         |
| Left supramarginal gyrus                                     | -44                    | -46      | 46       | 10.27              | 1528                         |
| <b><i>Occipital</i></b>                                      |                        |          |          |                    |                              |
| Right superior occipital gyrus<br>(lateral occipital cortex) | 30                     | -64      | 38       | 11.56              | 1940                         |
| Left superior occipital gyrus<br>(lateral occipital cortex)  | -24                    | -64      | 44       | 9.43               | 1528                         |
| <b><i>Insula</i></b>                                         |                        |          |          |                    |                              |
| Left insula                                                  | -30                    | 22       | 2        | 8.54               | 147                          |
| Right insula                                                 | 34                     | 22       | 0        | 8.52               | 234                          |
| <b><i>Cerebellum</i></b>                                     |                        |          |          |                    |                              |
| Left Cerebellum (crus)                                       | -26                    | -64      | -30      | 7.6                | 210                          |
| Right Cerebellum (crus)                                      | 30                     | -62      | -32      | 7.51               | 344                          |

## Supplemental Table 2b:

Task Main effects for all subjects (baseline comparison):

Areas of Significant Baseline Activation ( $p < 0.05$   $FWE$  corrected) for 2-back>0 back task

| Brain region                                              | MNI Coordinates |          |          | Max <i>t</i> -score | <i>K<sub>e</sub></i> cluster |
|-----------------------------------------------------------|-----------------|----------|----------|---------------------|------------------------------|
|                                                           | <i>x</i>        | <i>y</i> | <i>z</i> |                     |                              |
| <b><i>Dorsolateral prefrontal</i></b>                     |                 |          |          |                     |                              |
| Right middle frontal gyrus                                | 44              | 34       | 28       | 15.72               | 25383                        |
| Left inferior frontal gyrus<br>(pars triangularis)        | -46             | 30       | 28       | 12.72               |                              |
| <b><i>Lateral Parietal (inferior parietal lobule)</i></b> |                 |          |          |                     |                              |
| Right supramarginal gyrus                                 | 40              | -44      | 38       | 13.93               | 6009                         |
| Left supramarginal gyrus                                  | -38             | -44      | 40       | 13.57               |                              |
| <b><i>Lateral Occipital</i></b>                           |                 |          |          |                     |                              |
| Left middle occipital gyrus                               | -26             | -68      | 36       | 13.19               | 6009                         |
| Right occipital fusiform<br>gyrus                         | 38              | -70      | -20      | 8.83                |                              |
| <b><i>Cerebellum</i></b>                                  |                 |          |          |                     |                              |
| Left cerebellum                                           | -26             | -66      | -30      | 11.56               | 3873                         |
| Right cerebellum                                          | 30              | -64      | -30      | 10.88               |                              |

### Supplemental Table 3:

#### Baseline Quality of life and other behavioural measures

|        | Treatment group<br>(n=19) |             | Control group<br>(n=19) |             | <i>p</i> |
|--------|---------------------------|-------------|-------------------------|-------------|----------|
|        | <i>Mean</i>               | <i>± SD</i> | <i>Mean ±</i>           | <i>± SD</i> |          |
| FAMS   | 87.26                     | 23.00       | 101.06                  | 31.98       | .170     |
| PAM-13 | 59.52                     | 18.42       | 64.26                   | 15.65       | .398     |
| EQ5D   | 0.52                      | 0.18        | 0.61                    | 0.19        | 0.18     |
| USE-MS | 48.26                     | 18.01       | 59.74                   | 19.96       | .270     |
| MSNQ-S | 36.89                     | 13.49       | 34.68                   | 11.51       | .590     |
| HADS-D | 9.47                      | 3.55        | 8.47                    | 3.21        | .507     |
| HADS-A | 9.26                      | 3.72        | 9.37                    | 5.56        | .946     |
| FSS    | 52.37                     | 10.40       | 48.84                   | 13.59       | .375     |

*FAMS* Functional Assessment of MS, *MSNQ* Multiple Sclerosis Neuropsychological Questionnaire,

*PAM-13*, Patient Activation Measure *EQ-5D*, EuroQOL five dimension questionnaire

*FSS* Fatigue Severity Scale

USE-MS Unidimensional Self-Efficacy scale for MS,

HADS, Hospital Anxiety and Depression Scale (HADS-D = depression, HADS-A = anxiety subscale)

**Supplemental Table 4: Quality of Life outcomes at follow up by treatment group.**

| <i>Scores at Time 1,<br/>Time 2 &amp; Time 3</i> | <b>Treatment (n=17)</b> |             | <b>Control (n=14)</b> |             | <i>p</i> |
|--------------------------------------------------|-------------------------|-------------|-----------------------|-------------|----------|
|                                                  | <i>Mean</i>             | <i>± SD</i> | <i>Mean</i>           | <i>± SD</i> |          |
| FAMS 1                                           | 85.24                   | 22.61       | 102.79                | 35.06       | 0.719    |
| FAMS 2                                           | 82.18                   | 25.09       | 99.14                 | 36.89       |          |
| FAMS 3                                           | 89.00                   | 30.99       | 101.00                | 32.40       |          |
| PAM-13 1                                         | 54.62                   | 17.13       | 65.58                 | 14.66       | 0.158    |
| PAM-13 2                                         | 59.15                   | 13.65       | 64.15                 | 13.81       |          |
| PAM-13 3                                         | 58.79                   | 15.52       | 62.10                 | 15.90       |          |
| EQ-5D 1                                          | 0.49                    | 0.13        | 0.61                  | 0.22        | 0.388    |
| EQ-5D 2                                          | 0.49                    | 0.23        | 0.53                  | 0.26        |          |
| EQ-5D 3                                          | 0.53                    | 0.20        | 0.57                  | 0.27        |          |
| MSNQ-S 1                                         | 35.65                   | 13.56       | 34.79                 | 12.34       | 0.892    |
| MSNQ-S 2                                         | 32.76                   | 13.81       | 31.36                 | 15.83       |          |
| MSNQ-S 3                                         | 29.18                   | 15.14       | 28.93                 | 13.13       |          |
| HADS-D 1                                         | 9.82                    | 3.38        | 9.21                  | 3.38        | 0.921    |
| HADS-D 2                                         | 9.82                    | 3.34        | 9.50                  | 4.35        |          |
| HADS-D 3                                         | 9.35                    | 2.85        | 8.79                  | 4.21        |          |
| HADS-A 1                                         | 9.18                    | 3.80        | 9.86                  | 5.74        | 0.334    |
| HADS-A 2                                         | 9.29                    | 4.47        | 8.21                  | 5.06        |          |
| HADS-A 3                                         | 8.53                    | 4.38        | 6.86                  | 4.93        |          |
| FSS 1                                            | 52.12                   | 10.89       | 49.43                 | 14.18       | 0.912    |
| FSS 2                                            | 52.53                   | 13.21       | 48.57                 | 15.64       |          |
| FSS 3                                            | 52.53                   | 11.47       | 49.29                 | 15.50       |          |
| USE-MS 1                                         | 16.00                   | 5.85        | 19.00                 | 6.72        | 0.996    |
| USE-MS 2                                         | 15.76                   | 5.62        | 18.69                 | 6.60        |          |
| USE-MS 3                                         | 16.47                   | 5.70        | 19.31                 | 8.70        |          |

FAMS: Functional Assessment of MS; PAM-13: Patient Activation Measure; EQ5D: EuroQOL five dimension questionnaire; USE-MS: Unidimensional Self-Efficacy scale for MS; MSNQ: Multiple Sclerosis Neuropsychological Questionnaire; HADS-D: Hospital Anxiety and Depression Scale (depression); HADS-A: Hospital Anxiety and Depression Scale (anxiety); FSS: Fatigue Severity Scale;

**Supplemental Table 5: N-back error rate**

| <i>N-back Errors<br/>(Time 1, Time 2 &amp; Time 3)</i> | <b>Treatment (n=17)</b> |           |                     | <b>Control (n=14)</b> |           |                     | <i>p</i> |
|--------------------------------------------------------|-------------------------|-----------|---------------------|-----------------------|-----------|---------------------|----------|
|                                                        | <i>Mean</i>             | <i>SD</i> | <i>% error rate</i> | <i>Mean</i>           | <i>SD</i> | <i>% error rate</i> |          |
| 0-back 1                                               | 3.24                    | 3.419     | 5.14                | 3.71                  | 4.92      | 5.89                | .951     |
| 0-back 2                                               | 1.88                    | 2.395     | 6.06                | 2.43                  | 3.13      | 7.84                |          |
| 0-back 3                                               | 2.53                    | 3.642     | 8.16                | 2.64                  | 2.50      | 8.52                |          |
| 1-back 1                                               | 2.71                    | 3.478     | 4.30                | 4.57                  | 8.42      | 7.25                | .270     |
| 1-back 2                                               | 1.47                    | 2.183     | 4.74                | 1.86                  | 1.61      | 6.00                |          |
| 1-back 3                                               | 3.06                    | 3.269     | 9.87                | 2.14                  | 1.99      | 6.42                |          |
| 2-back 1                                               | 5.24                    | 4.816     | 8.32                | 6.00                  | 9.83      | 9.52                | .900     |
| 2-back 2                                               | 4.12                    | 3.551     | 13.29               | 5.29                  | 4.68      | 17.06               |          |
| 2-back 3                                               | 4.76                    | 5.761     | 15.35               | 5.29                  | 3.83      | 17.06               |          |

## Appendix for MRI methodology

| Hardware                          |                      |
|-----------------------------------|----------------------|
| Field strength                    | 1.5T                 |
| Manufacturer                      | Siemens              |
| Model                             | Avanto               |
| Coil type<br>(e.g. head, surface) | 32-channel head coil |
| Number of coil channels           | 32                   |

| Acquisition sequence                                              |                                                     |
|-------------------------------------------------------------------|-----------------------------------------------------|
| Type<br>(e.g. FLAIR, DIR, DTI, fMRI)                              | Dual echo TSE                                       |
| Acquisition time                                                  | 4 min                                               |
| Orientation                                                       | Axial-oblique                                       |
| Alignment<br>(e.g. anterior commissure/poster<br>commissure line) | Anterior commissure-posterior commissure<br>(AC-PC) |
| Voxel size                                                        | 0.898x0.898x5 mm <sup>3</sup>                       |
| TR                                                                | 3040ms                                              |
| TE                                                                | 11/ms                                               |
| TI                                                                | N/A                                                 |
| Flip angle                                                        | 150 degrees                                         |
| NEX                                                               | 2                                                   |
| Field of view                                                     | 230x201mm <sup>2</sup>                              |
| Matrix size                                                       | 256x224                                             |
| Parallel imaging                                                  | No                                                  |
| Cardiac gating                                                    | No                                                  |
| Contrast enhancement                                              | No                                                  |



| Acquisition sequence |    |
|----------------------|----|
| Other parameters:    |    |
| ETL                  | 6  |
| Number of slices     | 33 |

| Acquisition sequence                                           |                                          |
|----------------------------------------------------------------|------------------------------------------|
| Type<br>(e.g. FLAIR, DIR, DTI, fMRI)                           | Task-based fMRI<br>(ECHO planar imaging) |
| Acquisition time                                               | 3 runs (9 mins each)                     |
| Orientation                                                    | axial                                    |
| Alignment<br>(e.g. anterior commissure/poster commissure line) | AC-PC                                    |
| TR                                                             | 2520ms                                   |
| TE                                                             | 43ms                                     |
| TI                                                             |                                          |
| Flip angle                                                     | 90                                       |
| NEX                                                            |                                          |
| Field of view                                                  | 192x192mm <sup>2</sup>                   |
| Matrix size                                                    | 64x64                                    |
| Parallel imaging                                               | <b>Yes</b>                               |
| If used, parallel imaging method:<br>(e.g. SENSE, GRAPPA)      | GRAPPA, acceleration factor=2            |
| Cardiac gating                                                 | No                                       |
| Contrast enhancement                                           | No                                       |

| Acquisition sequence                 |                                                  |
|--------------------------------------|--------------------------------------------------|
| Type<br>(e.g. FLAIR, DIR, DTI, fMRI) | MT-bSSFP                                         |
| Acquisition time                     | 12 volumes for a total duration of ~<br>7minutes |
| Orientation                          | Axial oblique                                    |

| Acquisition sequence                                              |                              |
|-------------------------------------------------------------------|------------------------------|
| Alignment<br>(e.g. anterior commissure/poster<br>commissure line) | AC-PC                        |
| Voxel size                                                        | 0.93x0.93x5 mm <sup>3</sup>  |
| TR                                                                | Ranging from 3.66 to 5.96 ms |
| TE                                                                | =TR/2                        |
| TI                                                                | N/A                          |
| Flip angle                                                        | Ranging from 5 to 40 degrees |
| NEX                                                               | 1                            |
| Field of view                                                     | 240x180mm <sup>2</sup>       |
| Matrix size                                                       | 256 x 96                     |
| Parallel imaging                                                  | No                           |
| Cardiac gating                                                    | No                           |
| Contrast enhancement                                              | No                           |
